# Supplementary material for: Modeling of aerosol property evolution during winter haze episodes over a megacity cluster in northern China: Roles of regional transport and heterogeneous reactions
Source: Copernicus journal article supplement (doi:10.5194/acp-2018-1189), 2018-11-27
Supplement: Supplementary file 1 [file acp-2018-1189-supplement.pdf]

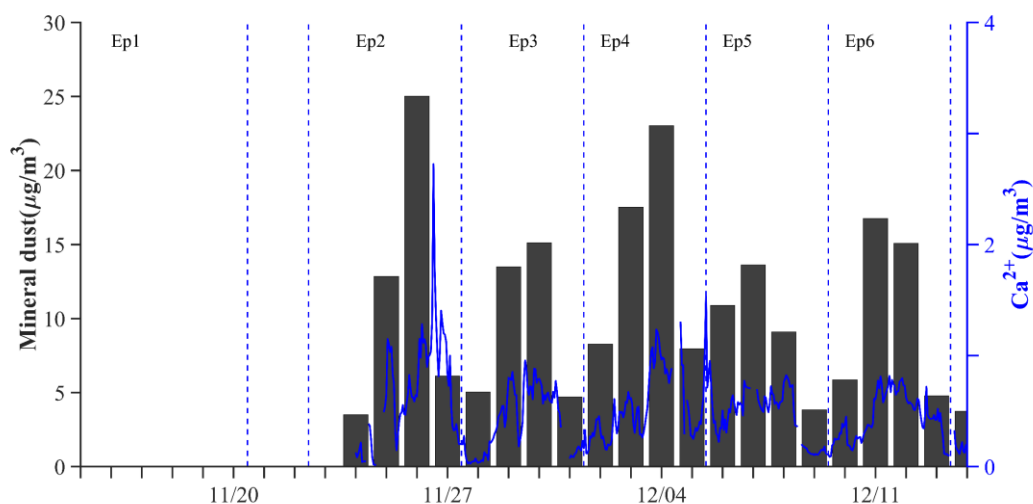

**Figure S1.** Concentration of mineral dust and  $\text{Ca}^{2+}$  in  $\text{PM}_{2.5}$  during the study period. And  $\text{Mineral} = 2.2 \times [\text{Al}] + 2.49 \times [\text{Si}] + 1.63 \times [\text{Ca}] + 2.42 \times [\text{Fe}] + 1.94 \times [\text{Ti}]$ .

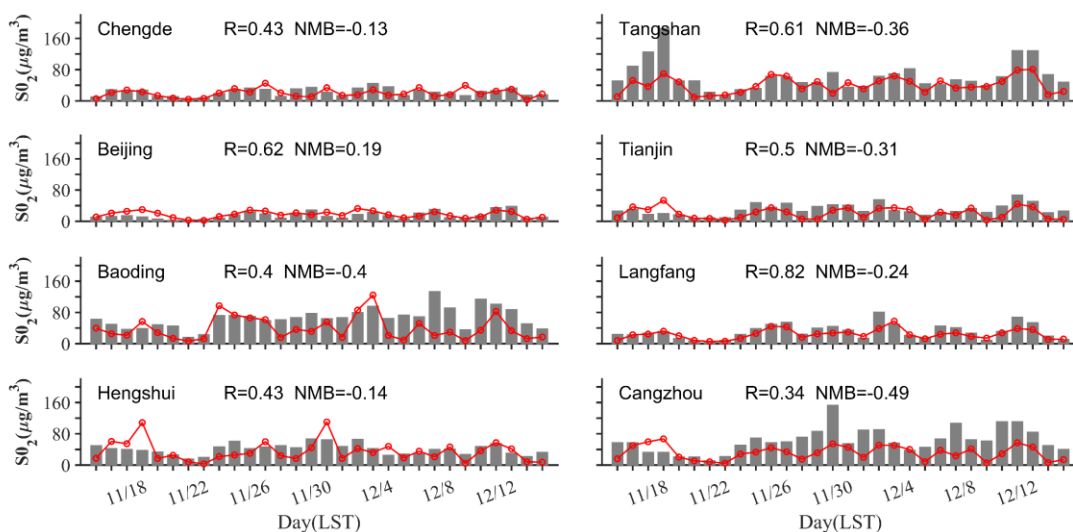

**Figure S2.** Comparison between the simulated (red) and observed (gray bars) daily concentrations of  $\text{SO}_2$ .

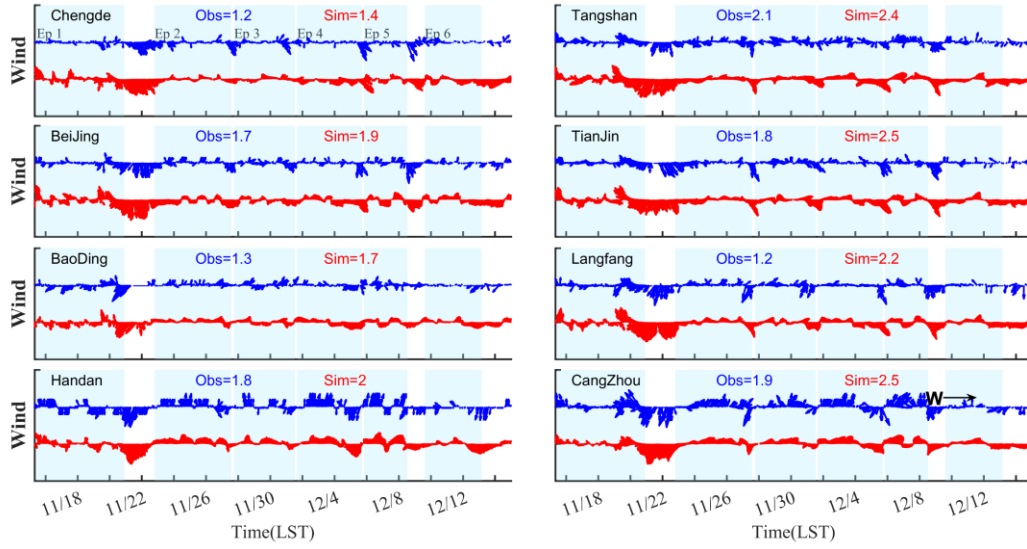

**Figure S3.** Comparison between simulated (red) and observed (blue) wind vector and wind speeds (data) at cities of BTH.

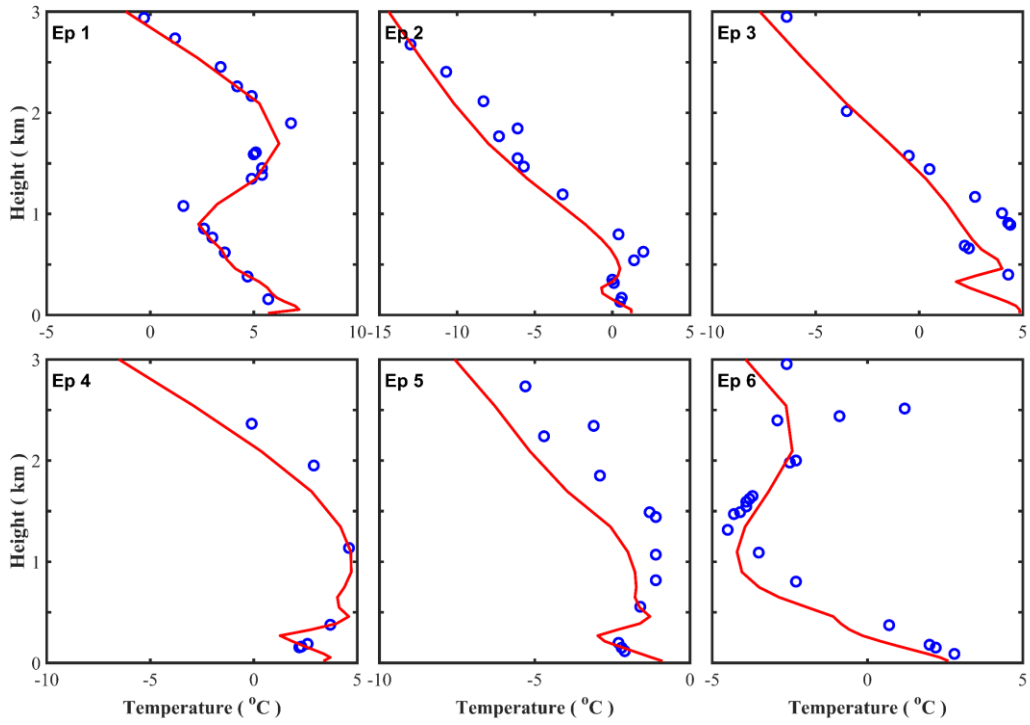

**Figure S4.** Comparison between simulated (red solid line) and observed (blue dot) temperature profiles during episodes in Beijing.

**Table S1.** Statistics performances of meteorological simulations

|              |         | Obs  | Sim  | NMB  | R    | RMSE |
|--------------|---------|------|------|------|------|------|
| <b>T2(K)</b> | Beijing | 2.42 | 3.31 | 0.37 | 0.88 | 2.11 |

|                  |          |       |       |       |      |       |
|------------------|----------|-------|-------|-------|------|-------|
|                  | Tianjin  | 4.05  | 3.73  | -0.08 | 0.93 | 1.48  |
|                  | Langfang | 2.13  | 3.06  | 0.44  | 0.89 | 2.13  |
|                  | Chengde  | -3.39 | -1.66 | -0.51 | 0.89 | 3.31  |
|                  | Beijing  | 53.93 | 39.53 | -0.27 | 0.69 | 21.87 |
| <b>RH2(%)</b>    | Tianjin  | 56.95 | 47.58 | -0.16 | 0.73 | 18.09 |
|                  | Langfang | 60.39 | 46.54 | -0.23 | 0.71 | 21.54 |
|                  | Chengde  | 61.56 | 55.96 | -0.09 | 0.47 | 20.26 |
|                  | Beijing  | 1.68  | 1.93  | 0.15  | 0.65 | 1.30  |
| <b>WS10(m/s)</b> | Tianjin  | 1.76  | 2.46  | 0.39  | 0.70 | 1.50  |
|                  | Langfang | 1.23  | 2.15  | 0.74  | 0.57 | 1.56  |
|                  | Chengde  | 1.16  | 1.41  | 0.21  | 0.63 | 1.22  |
